# Supplementary material
Source: PubMed Central journal article supplement (PMC2845426)
Supplement: fj.09-133728_1.pdf [file fj.09-133728_1.pdf]

**A**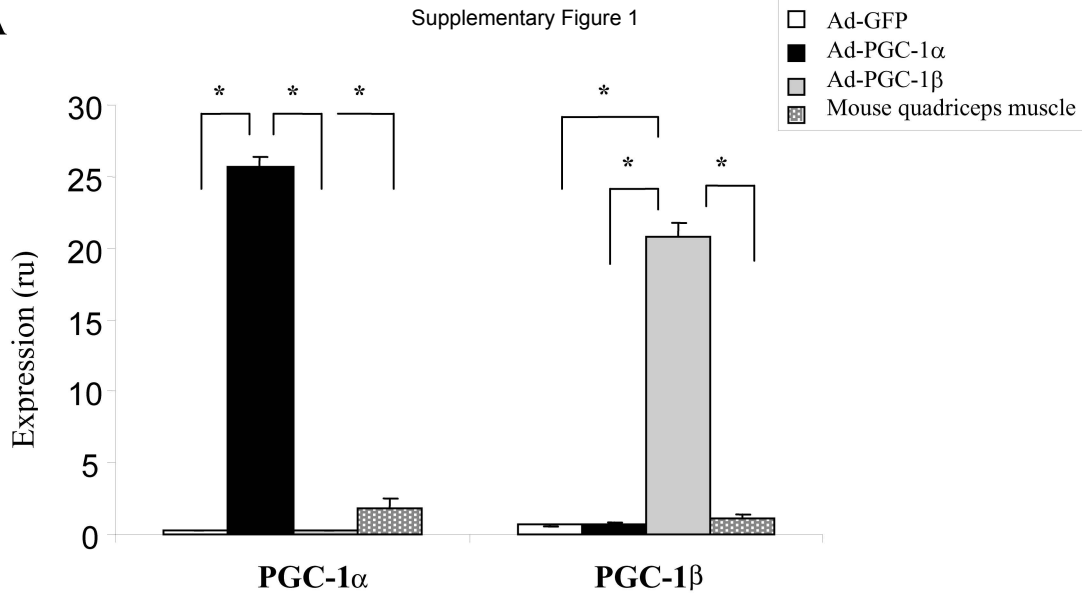**B**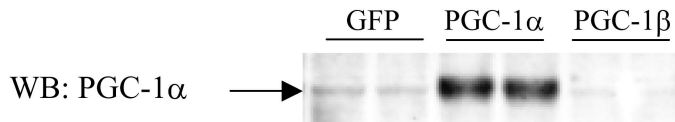

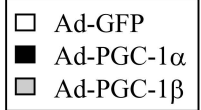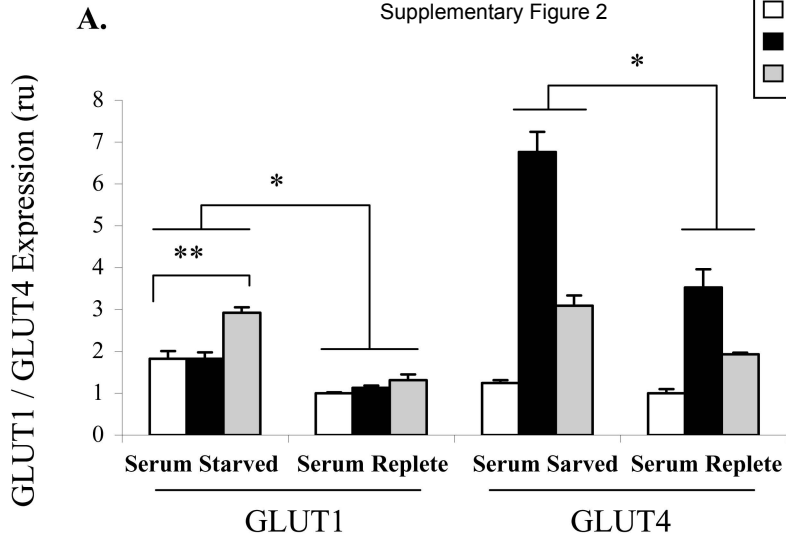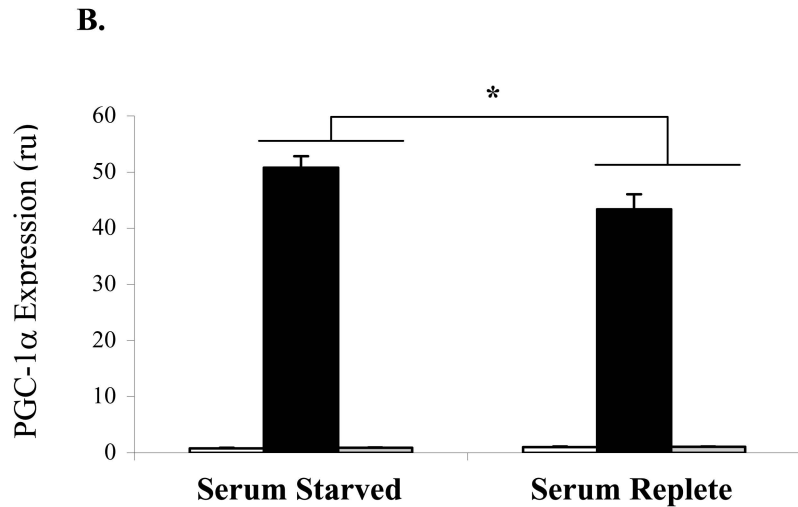

Supplementary Figure 3

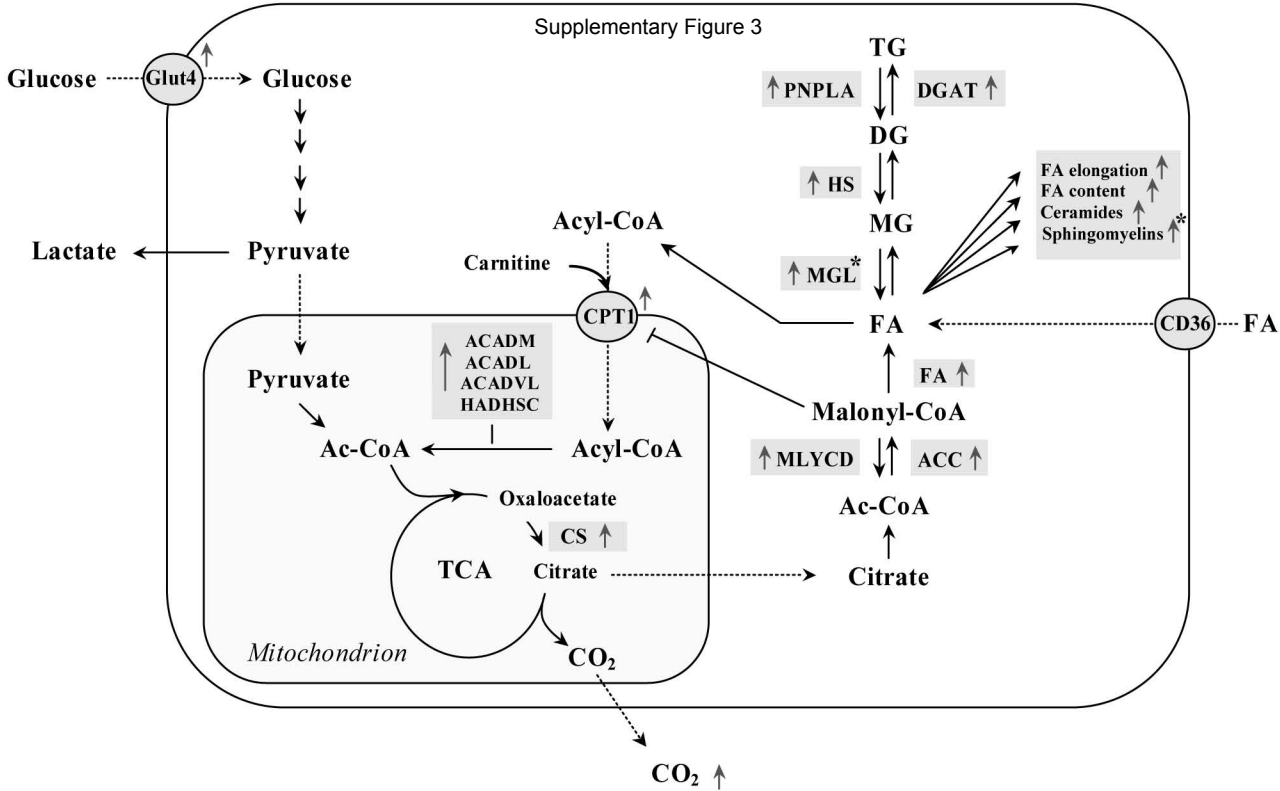

| Target mRNA    | Forward oligo (5' ---> 3') | Reverse oligo (5' ---> 3') |
|----------------|----------------------------|----------------------------|
| PGC-1 $\alpha$ | GTCAACAGCAAAAGCCACAA       | TCTGGGGTCAGAGGAAGAGA       |
| PGC-1 $\beta$  | GTCCCTGGCTGACATTCCT        | GCACGGATCTCATGGTCTCT       |
| FAS            | GGCTCTATGGATTACCCAAGG      | CCAGTGTTCGTTCCCTGGGGA      |
| NR4A1          | CGCTGTGCAGTCTGTGGT         | GCAGATGTACTTGCGCCTTT       |
| NRF1           | GCAGCACCTTTGGAGAATG        | CCCGACCTGTGGAATACTTG       |
| CS             | GTGTCTTGGCTCTCACGAGAATGG   | TCAATGGCTCCGATACTGCTGC     |
| ESRR $\alpha$  | GGAGGACGGCAGAAGTACAAA      | GCGACACCAGAGCGTTTAC        |
| CD36           | GCAAAGAAGGAAAGCCTGTG       | TCACCAATGGTCCCAGTCTC       |
| TLR4           | TCCCTGCATAGAGGTAGTTC       | GTAAGCCATGCCATGCCT         |
| DGAT1          | CATGAAGCCCTTCAAGGATA       | GGAACGCTCACTAGGTACTCA      |
| SCD1           | ACACCTGCCTCTTCGGGA         | AAGCACATCAGCAGGAGGC        |
| CPT1b          | GTGCTCAAGTCATGGTGGCAA      | TGCTCTCTGAGAGGTGCTGTAGCAA  |
| ACADM          | TGGAGACATTGCCAATCAGC       | ACCATAGAGCTGAAGACAGG       |
| TBP            | ACCCTTACCAATGACTCCTATG     | TGACTGCAGCAAATCGCTTGG      |
| HADHSC         | AGACATCTGGCAAAATCCAA       | CCACAAACTCATCTCCAGCCTTA    |
| PNPLA2         | TGAGCTCATCCAGGCCAA         | CCTGAGGGCAGATGTCACTC       |
| LIPE           | ATGTACGCTACACAAAGGC        | TTCAAATTCAGCCCCACG         |
| MGLL           | TGCCATCTCCATCCTAGT         | GGTCAGAGTTGTACAGGTCA       |
| NDUFS1         | TTGGGAACAACAGGAAGAGG       | TTCCCACTGCATCCATTACA       |
| NDUFA5         | GCGGAGCCAGATGTTAAAAA       | CCATCCACCATCTGACACTG       |
| SDHB           | CTGGTGAACGGAGACAAGT        | GTTAAGCCAATGCTCGCTTC       |
| UQCR           | GGGGTGACCCTGAGTATTGA       | ATGTAAGGCACCCAGTCCAG       |
| UQCRC2         | TCCAACAACCTGGGAACCTC       | GGTGCTGTGGTGACATTGAG       |
| COX5B          | CAGAAGGGACTGGACCATA        | ATAACACAGGGGCTCAGTGG       |
| COX7C          | AGAACTTCCAGCAGCGACAT       | TAAAGAAAGGTGCGGCAAAAC      |
| CYC1           | GCTACCCATGGTCTCATCGT       | CATCATCATTAGGGCCATCC       |
| CYCS           | GCCCCGAACGAATTAATAAAT      | CCAGGTGATGCCTTTGTCT        |
| ATP5K          | CGGTTCAAGGTCTCTCCACTC      | TGACGCCTCACTTGAGAATG       |
| UCP2           | TGACTCTCTGTGTCTCCTG        | GAGTTCTGGAGGCTGCTTTG       |
| UCP1           | TTGCCGTGGCAGATATCATCA      | TGCATTCTGACCTTACGAC        |
| IDH2           | GGCTGTCAAGTGTGCCACAAT      | TCGTTCCGTTAGGGGCTCTTC      |

|                           |                                                                         |
|---------------------------|-------------------------------------------------------------------------|
| Pparg1a (PGC-1 $\alpha$ ) | peroxisome proliferative activated receptor, gamma, coactivator 1 alpha |
| Pparg1b (PGC-1 $\beta$ )  | peroxisome proliferative activated receptor, gamma, coactivator 1, beta |

### Lipid metabolism

|              |                                                       |
|--------------|-------------------------------------------------------|
| Acaca (ACC1) | acetyl-Coenzyme A carboxylase alpha                   |
| Acacb (ACC2) | acetyl-Coenzyme A carboxylase beta                    |
| Fasn         | fatty acid synthase                                   |
| Cs           | citrate synthase                                      |
| Scd1         | stearoyl-Coenzyme A desaturase 1                      |
| Dgat1        | diacylglycerol O-acyltransferase 1                    |
| Cd36         | CD36 antigen                                          |
| Tlr4         | toll-like receptor 4                                  |
| Cpt1b        | carnitine palmitoyltransferase 1b, muscle             |
| Hadhsc       | L-3-hydroxyacyl-Coenzyme A dehydrogenase, short chain |
| Acadm        | acyl-Coenzyme A dehydrogenase, medium chain           |
| Acadl        | acyl-Coenzyme A dehydrogenase, long-chain             |
| Acadvl       | acyl-Coenzyme A dehydrogenase, very long chain        |
| Acox1        | acyl-Coenzyme A oxidase 1, palmitoyl                  |
| Pnpla2       | patatin-like phospholipase domain containing 2        |
| Lipe         | lipase, hormone sensitive                             |
| Mgl1         | monoglyceride lipase                                  |
| Mlycd        | malonyl-CoA decarboxylase                             |

### Glucose metabolism

|                |                                                                     |
|----------------|---------------------------------------------------------------------|
| Slc2a1 (Glut1) | solute carrier family 2 (facilitated glucose transporter), member 1 |
| Slc2a4 (Glut4) | solute carrier family 2 (facilitated glucose transporter), member 4 |

### Transcription factors

|       |                                                 |
|-------|-------------------------------------------------|
| Nr4a1 | nuclear receptor subfamily 4, group A, member 1 |
| Esrra | estrogen related receptor, alpha                |
| Nrf1  | nuclear respiratory factor 1                    |
| Tfam  | transcription factor A, mitochondrial           |
| Foxo1 | forkhead box O1                                 |

### Nuclear-encoded mitochondrial genes

|        |                                                                                  |
|--------|----------------------------------------------------------------------------------|
| Ndufs1 | NADH dehydrogenase (ubiquinone) Fe-S protein 1                                   |
| Ndufa5 | NADH dehydrogenase (ubiquinone) 1 alpha subcomplex, 5                            |
| Sdhb   | succinate dehydrogenase complex, subunit B, iron sulfur (Ip)                     |
| Uqcr   | ubiquinol-cytochrome c reductase (6.4kD) subunit                                 |
| Uqcrc2 | ubiquinol cytochrome c reductase core protein 2                                  |
| Cox5b  | cytochrome c oxidase, subunit Vb                                                 |
| Cox7c  | cytochrome c oxidase, subunit VIIc                                               |
| Cyc1   | cytochrome c-1                                                                   |
| Cycs   | cytochrome c, somatic                                                            |
| Atp5k  | ATP synthase, H <sup>+</sup> transporting, mitochondrial F1F0 complex, subunit e |
| Atp5j2 | ATP synthase, H <sup>+</sup> transporting, mitochondrial F0 complex, subunit f,  |
| Ucp2   | uncoupling protein 2 (mitochondrial, proton carrier)                             |

**Adenovirus used for infection**

| <b>Target mRNA</b>                         | <b>GFP</b>    | <b>PGC-1<math>\alpha</math></b> | <b>PGC1<math>\beta</math></b> |
|--------------------------------------------|---------------|---------------------------------|-------------------------------|
| PGC-1 $\alpha$                             | 1.0 $\pm$ 0.1 | 115.7 $\pm$ 13.3 *              | 0.7 $\pm$ 0.1                 |
| PGC-1 $\beta$                              | 1.0 $\pm$ 0.5 | 6.7 $\pm$ 2.9                   | 46.5 $\pm$ 12.4 *             |
| <b>Lipid metabolism</b>                    |               |                                 |                               |
| ACC1                                       | 1.0 $\pm$ 0.1 | 1.3 $\pm$ 0.0 *                 | 1.4 $\pm$ 0.1 *               |
| ACC2                                       | 1.0 $\pm$ 0.1 | 6.0 $\pm$ 0.5 *                 | 2.3 $\pm$ 0.2 *               |
| Fasn                                       | 1.0 $\pm$ 0.1 | 1.5 $\pm$ 0.1 *                 | 1.6 $\pm$ 0.1 *               |
| Cs                                         | 1.0 $\pm$ 0.1 | 3.1 $\pm$ 0.1 *                 | 1.9 $\pm$ 0.1 *               |
| Scd1                                       | 1.0 $\pm$ 0.0 | 0.9 $\pm$ 0.1                   | 0.7 $\pm$ 0.1                 |
| Dgat1                                      | 1.0 $\pm$ 0.1 | 2.7 $\pm$ 0.5 *                 | 1.4 $\pm$ 0.1                 |
| Cd36                                       | 1.0 $\pm$ 0.1 | 1.4 $\pm$ 0.1 *                 | 0.5 $\pm$ 0.1 *               |
| Tlr4                                       | 1.0 $\pm$ 0.0 | 0.9 $\pm$ 0.1                   | 0.8 $\pm$ 0.0 *               |
| Cpt1b                                      | 1.0 $\pm$ 0.1 | 13.1 $\pm$ 1.2 *                | 4.6 $\pm$ 0.5 *               |
| Hadhs                                      | 1.0 $\pm$ 0.1 | 1.5 $\pm$ 0.2 *                 | 1.0 $\pm$ 0.1                 |
| Acadm                                      | 1.0 $\pm$ 0.0 | 3.1 $\pm$ 0.5 *                 | 1.6 $\pm$ 0.1                 |
| Acadl                                      | 1.0 $\pm$ 0.1 | 1.7 $\pm$ 0.1 *                 | 1.4 $\pm$ 0.1 *               |
| Acadvl                                     | 1.0 $\pm$ 0.1 | 2.1 $\pm$ 0.1 *                 | 1.6 $\pm$ 0.1 *               |
| Acox1                                      | 1.0 $\pm$ 0.1 | 0.8 $\pm$ 0.1 *                 | 0.8 $\pm$ 0.0 *               |
| Pnpla2                                     | 1.0 $\pm$ 0.2 | 1.7 $\pm$ 0.2 *                 | 1.5 $\pm$ 0.2                 |
| Lipe                                       | 1.0 $\pm$ 0.2 | 1.5 $\pm$ 0.2                   | 1.5 $\pm$ 0.3                 |
| Mgl1                                       | 1.0 $\pm$ 0.1 | 1.0 $\pm$ 0.1                   | 1.4 $\pm$ 0.2 *               |
| Mlycd                                      | 1.0 $\pm$ 0.1 | 1.5 $\pm$ 0.1 *                 | 1.1 $\pm$ 0.1                 |
| <b>Glucose metabolism</b>                  |               |                                 |                               |
| Glut1                                      | 1.0 $\pm$ 0.0 | 1.1 $\pm$ 0.1                   | 1.3 $\pm$ 0.1 *               |
| Glut4                                      | 1.0 $\pm$ 0.1 | 3.5 $\pm$ 0.4 *                 | 1.9 $\pm$ 0.0 *               |
| <b>Transcription factors</b>               |               |                                 |                               |
| Nr4a1                                      | 1.0 $\pm$ 0.1 | 0.9 $\pm$ 0.1                   | 0.9 $\pm$ 0.0                 |
| Esrra                                      | 1.0 $\pm$ 0.0 | 5.3 $\pm$ 1.0 *                 | 2.2 $\pm$ 0.1                 |
| Nrf1                                       | 1.0 $\pm$ 0.0 | 1.1 $\pm$ 0.1                   | 1.1 $\pm$ 0.1                 |
| Tfam                                       | 1.0 $\pm$ 0.1 | 1.8 $\pm$ 0.2 *                 | 1.6 $\pm$ 0.1 *               |
| Foxo1                                      | 1.0 $\pm$ 0.0 | 1.1 $\pm$ 0.0 *                 | 1.1 $\pm$ 0.0 *               |
| <b>Nuclear-encoded mitochondrial genes</b> |               |                                 |                               |
| Ndufs1                                     | 1.0 $\pm$ 0.1 | 2.2 $\pm$ 0.2 *                 | 1.8 $\pm$ 0.1 *               |
| Ndufa5                                     | 1.0 $\pm$ 0.1 | 2.3 $\pm$ 0.2 *                 | 2.0 $\pm$ 0.2 *               |
| Sdhb                                       | 1.0 $\pm$ 0.1 | 2.8 $\pm$ 0.2 *                 | 2.7 $\pm$ 0.1 *               |
| Uqcrc1                                     | 1.0 $\pm$ 0.1 | 1.2 $\pm$ 0.1 *                 | 1.2 $\pm$ 0.1                 |
| Uqcrc2                                     | 1.0 $\pm$ 0.1 | 2.7 $\pm$ 0.1 *                 | 2.6 $\pm$ 0.2 *               |
| Cox5b                                      | 1.0 $\pm$ 0.1 | 3.0 $\pm$ 0.4 *                 | 2.5 $\pm$ 0.2 *               |
| Cox7c                                      | 1.0 $\pm$ 0.1 | 1.8 $\pm$ 0.2 *                 | 1.4 $\pm$ 0.2                 |
| Cyc1                                       | 1.0 $\pm$ 0.1 | 2.0 $\pm$ 0.1 *                 | 1.6 $\pm$ 0.1 *               |
| Cycs                                       | 1.0 $\pm$ 0.2 | 2.2 $\pm$ 0.1 *                 | 1.9 $\pm$ 0.1 *               |
| Atp5k                                      | 1.0 $\pm$ 0.1 | 1.2 $\pm$ 0.1                   | 0.8 $\pm$ 0.1                 |
| Atp5j2                                     | 1.0 $\pm$ 0.2 | 1.7 $\pm$ 0.1 *                 | 1.4 $\pm$ 0.1 *               |
| Ucp2                                       | 1.0 $\pm$ 0.1 | 0.8 $\pm$ 0.0 *                 | 1.0 $\pm$ 0.0                 |
